# Supplementary material for: Observations of fine particulate nitrated phenols in four sites in northern China: concentrations, source apportionment, and secondary formation
Source: Copernicus journal article supplement (doi:10.5194/acp-18-4349-2018), 2018-03-29
Supplement: Supplementary file 1 [file acp-18-4349-2018-supplement.pdf]

Supplement of Atmos. Chem. Phys., 18, 4349–4359, 2018  
<https://doi.org/10.5194/acp-18-4349-2018-supplement>  
© Author(s) 2018. This work is distributed under  
the Creative Commons Attribution 4.0 License.

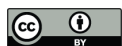

*Supplement of*

## **Observations of fine particulate nitrated phenols in four sites in northern China: concentrations, source apportionment, and secondary formation**

**Liwei Wang et al.**

*Correspondence to:* Xinfeng Wang (xinfengwang@sdu.edu.cn)

The copyright of individual parts of the supplement might differ from the CC BY 4.0 License.

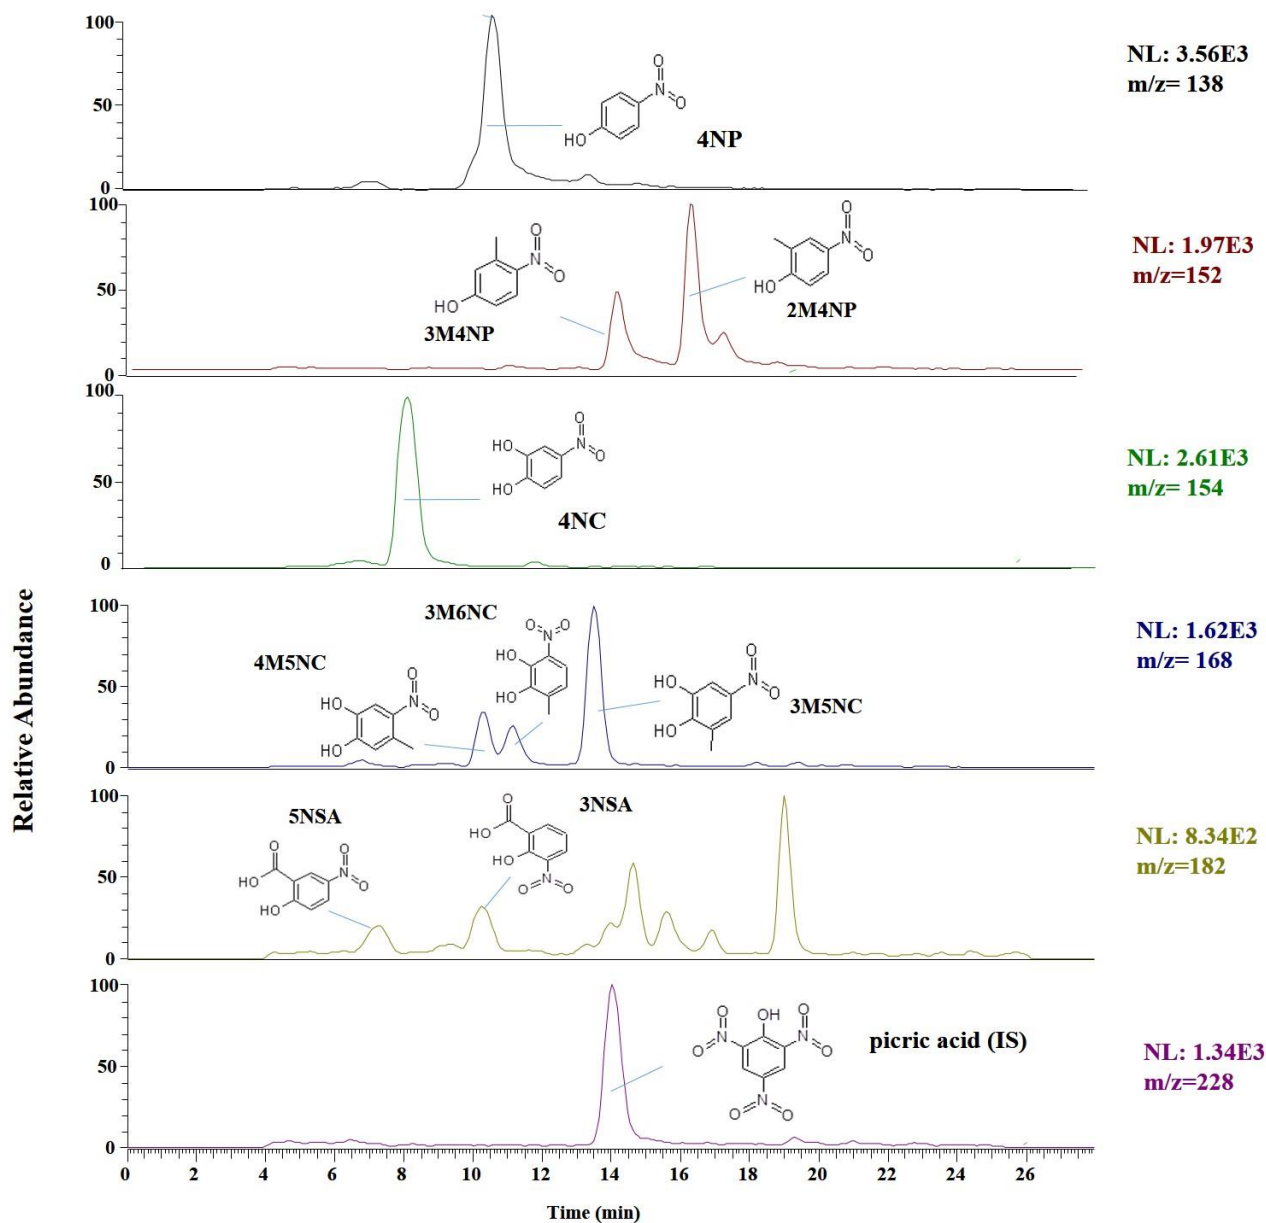

Figure S1. Extracted ion chromatogram spectra for the mass-to-charge ratios of 138, 152, 154, 168, 182, and 228 amu obtained from ambient PM<sub>2.5</sub> sample and the identified nine nitrated phenols.
